# Supplementary material for: Complex Evaluation of Antioxidant Capacity of Milk Thistle Dietary Supplements
Source: MDPI journal article supplement (doi:10.3390/antiox8080317), 2019-08-18
Supplement: s1 [file s1]

# Complex Evaluation of Antioxidant Capacity of Milk Thistle Dietary Supplements

Jitka Viktorova <sup>1</sup>, Milena Stranska-Zachariasova <sup>2,\*</sup>, Marie Fenclova <sup>2</sup>, Libor Vitek <sup>3</sup>,  
Jana Hajslova <sup>2</sup>, Vladimir Kren <sup>4</sup> and Tomas Ruml <sup>1</sup>

<sup>1</sup> Department of Biochemistry and Microbiology, University of Chemistry and Technology Prague, Technická 5, 166 28 Prague, Czech Republic

<sup>2</sup> Department of Food Analysis and Nutrition, University of Chemistry and Technology Prague,  
Technická 5, 166 28 Prague, Czech Republic

<sup>3</sup> 4<sup>th</sup> Department of Internal Medicine and Institute of Medical Biochemistry and Laboratory Diagnostics, 1<sup>st</sup> Faculty of Medicine, Charles University, Katerinska 32, 12000 Prague, Czech Republic

<sup>4</sup> Laboratory of Biotransformation, Institute of Microbiology, Czech Academy of Sciences, Vídeňská 1083, 142 20 Prague, Czech Republic

\* Correspondence: milena.stranska@vscht.cz

**Supplementary Table 1** List of non-silymarin bioactive compounds reported in literature for *Silybum marianum* (SM)<sup>1, 2, 3-10</sup>, *Schisandra chinensis* (SCH)<sup>11</sup>, *Cordyceps sinensis* (CS)<sup>12, 13</sup>, *Scutellaria baicalensis* (SB)<sup>14, 15</sup>, *Cnicus benedictus* (CB)<sup>16</sup>, *Foeniculum vulgare* (FV)<sup>17, 18</sup>, *Taraxacum officinale* (TO)<sup>19</sup> and *Glycyrrhiza glabra* (GG)<sup>20</sup>.

| Compound name   | Summary formula                                 | Plant of origin |
|-----------------|-------------------------------------------------|-----------------|
| neusilychristin | C <sub>25</sub> H <sub>22</sub> O <sub>10</sub> | SM              |
| silyamandin     | C <sub>25</sub> H <sub>22</sub> O <sub>11</sub> | SM              |
| isosilandrin A  | C <sub>25</sub> H <sub>22</sub> O <sub>9</sub>  | SM              |
| isosilandrin B  | C <sub>25</sub> H <sub>22</sub> O <sub>9</sub>  | SM              |
| neosilyhermin A | C <sub>25</sub> H <sub>22</sub> O <sub>9</sub>  | SM              |
| neosilyhermin B | C <sub>25</sub> H <sub>22</sub> O <sub>9</sub>  | SM              |
| silandrin A     | C <sub>25</sub> H <sub>22</sub> O <sub>9</sub>  | SM              |
| silandrin B     | C <sub>25</sub> H <sub>22</sub> O <sub>9</sub>  | SM              |
| silyhermin      | C <sub>25</sub> H <sub>22</sub> O <sub>9</sub>  | SM              |
| silymonin       | C <sub>25</sub> H <sub>22</sub> O <sub>9</sub>  | SM              |
| apigenin        | C <sub>15</sub> H <sub>10</sub> O <sub>5</sub>  | SM              |
| genistein       | C <sub>15</sub> H <sub>10</sub> O <sub>5</sub>  | SM              |
| luteolin        | C <sub>15</sub> H <sub>10</sub> O <sub>6</sub>  | SM              |
| kaempferol      | C <sub>15</sub> H <sub>10</sub> O <sub>6</sub>  | SM              |
| quercetin       | C <sub>15</sub> H <sub>10</sub> O <sub>7</sub>  | SM              |

|                                              |                                                 |    |
|----------------------------------------------|-------------------------------------------------|----|
| myricetin                                    | C <sub>15</sub> H <sub>10</sub> O <sub>8</sub>  | SM |
| naringenin                                   | C <sub>15</sub> H <sub>12</sub> O <sub>5</sub>  | SM |
| dihydrokaempferol (aromadendrin)             | C <sub>15</sub> H <sub>12</sub> O <sub>6</sub>  | SM |
| eriodictyol                                  | C <sub>15</sub> H <sub>12</sub> O <sub>6</sub>  | SM |
| catechin                                     | C <sub>15</sub> H <sub>14</sub> O <sub>6</sub>  | SM |
| acacetin                                     | C <sub>16</sub> H <sub>12</sub> O <sub>5</sub>  | SM |
| genkwanin                                    | C <sub>16</sub> H <sub>12</sub> O <sub>5</sub>  | SM |
| hispidulin                                   | C <sub>16</sub> H <sub>12</sub> O <sub>6</sub>  | SM |
| chrysoeriol                                  | C <sub>16</sub> H <sub>12</sub> O <sub>6</sub>  | SM |
| kaempferol-3-methyl ether (isokaempferide)   | C <sub>16</sub> H <sub>12</sub> O <sub>6</sub>  | SM |
| nepetin                                      | C <sub>16</sub> H <sub>12</sub> O <sub>7</sub>  | SM |
| rhamentin                                    | C <sub>16</sub> H <sub>12</sub> O <sub>7</sub>  | SM |
| patuletin                                    | C <sub>16</sub> H <sub>12</sub> O <sub>8</sub>  | SM |
| apigenin-5,7-dimethyl ether                  | C <sub>17</sub> H <sub>14</sub> O <sub>5</sub>  | SM |
| pectolarigenin                               | C <sub>17</sub> H <sub>14</sub> O <sub>6</sub>  | SM |
| kumatakenin                                  | C <sub>17</sub> H <sub>14</sub> O <sub>6</sub>  | SM |
| jaceosidin                                   | C <sub>17</sub> H <sub>14</sub> O <sub>7</sub>  | SM |
| eupatilin                                    | C <sub>18</sub> H <sub>16</sub> O <sub>7</sub>  | SM |
| sudachitin                                   | C <sub>18</sub> H <sub>16</sub> O <sub>8</sub>  | SM |
| hymenoxin                                    | C <sub>19</sub> H <sub>18</sub> O <sub>8</sub>  | SM |
| quercetin-3-O-arabinoside                    | C <sub>20</sub> H <sub>18</sub> O <sub>11</sub> | SM |
| luteolin-7-O-glucuronide                     | C <sub>21</sub> H <sub>17</sub> O <sub>12</sub> | SM |
| apigenin-7-O-glucuronide                     | C <sub>21</sub> H <sub>18</sub> O <sub>11</sub> | SM |
| miquelianin (quercetin 3-glucoronide)        | C <sub>21</sub> H <sub>18</sub> O <sub>13</sub> | SM |
| isovitexin                                   | C <sub>21</sub> H <sub>20</sub> O <sub>10</sub> | SM |
| apigenin-7-O-glucoside                       | C <sub>21</sub> H <sub>20</sub> O <sub>10</sub> | SM |
| vitexin                                      | C <sub>21</sub> H <sub>20</sub> O <sub>10</sub> | SM |
| isoorientin                                  | C <sub>21</sub> H <sub>20</sub> O <sub>11</sub> | SM |
| orientin                                     | C <sub>21</sub> H <sub>20</sub> O <sub>11</sub> | SM |
| kaempferol-3-O-beta-D-glucoside (astragalin) | C <sub>21</sub> H <sub>20</sub> O <sub>11</sub> | SM |

|                                                  |                                                 |    |
|--------------------------------------------------|-------------------------------------------------|----|
| luteolin-7-O-glucoside (cynaroside)              | C <sub>21</sub> H <sub>20</sub> O <sub>11</sub> | SM |
| quercetin 3-O-galactoside (hyperoside)           | C <sub>21</sub> H <sub>20</sub> O <sub>12</sub> | SM |
| quercetin 3-O-glucoside (isoquercetin)           | C <sub>21</sub> H <sub>20</sub> O <sub>12</sub> | SM |
| spiraeoside (quercetin 4-O-glucoside)            | C <sub>21</sub> H <sub>20</sub> O <sub>12</sub> | SM |
| naringenin 7-O-beta-D-glucopyranoside            | C <sub>21</sub> H <sub>22</sub> O <sub>10</sub> | SM |
| isokaempferide 7-rhamnoside                      | C <sub>22</sub> H <sub>22</sub> O <sub>10</sub> | SM |
| isorhamnetin 3-O-glucoside                       | C <sub>22</sub> H <sub>22</sub> O <sub>12</sub> | SM |
| apigenin-4,7-diglucoside                         | C <sub>27</sub> H <sub>30</sub> O <sub>15</sub> | SM |
| kaempferol-3-rutinoside                          | C <sub>27</sub> H <sub>30</sub> O <sub>15</sub> | SM |
| rutin                                            | C <sub>27</sub> H <sub>30</sub> O <sub>16</sub> | SM |
| naringin                                         | C <sub>27</sub> H <sub>32</sub> O <sub>14</sub> | SM |
| hydroxybenzoic acid (salicylic acid)             | C <sub>7</sub> H <sub>6</sub> O <sub>3</sub>    | SM |
| beta-resorcylic acid (dihydroxybenzoic acid)     | C <sub>7</sub> H <sub>6</sub> O <sub>4</sub>    | SM |
| gallic acid                                      | C <sub>7</sub> H <sub>6</sub> O <sub>5</sub>    | SM |
| guaiacol                                         | C <sub>7</sub> H <sub>8</sub> O <sub>2</sub>    | SM |
| vanillic acid                                    | C <sub>8</sub> H <sub>8</sub> O <sub>4</sub>    | SM |
| syringaldehyde                                   | C <sub>9</sub> H <sub>10</sub> O <sub>4</sub>   | SM |
| syringic acid                                    | C <sub>9</sub> H <sub>10</sub> O <sub>5</sub>   | SM |
| coumaric acid                                    | C <sub>9</sub> H <sub>8</sub> O <sub>3</sub>    | SM |
| caffeic acid                                     | C <sub>9</sub> H <sub>8</sub> O <sub>4</sub>    | SM |
| coniferylaldehyd                                 | C <sub>10</sub> H <sub>10</sub> O <sub>3</sub>  | SM |
| ferulic acid                                     | C <sub>10</sub> H <sub>10</sub> O <sub>4</sub>  | SM |
| dihydroconiferyl alcohol                         | C <sub>10</sub> H <sub>14</sub> O <sub>3</sub>  | SM |
| ethyl caffeate                                   | C <sub>11</sub> H <sub>12</sub> O <sub>4</sub>  | SM |
| methyl ferulate                                  | C <sub>11</sub> H <sub>12</sub> O <sub>4</sub>  | SM |
| sinapinic acid                                   | C <sub>11</sub> H <sub>12</sub> O <sub>5</sub>  | SM |
| ellagic acid                                     | C <sub>14</sub> H <sub>6</sub> O <sub>8</sub>   | SM |
| 3-O-caffeoylquinic acid (PA1) (chlorogenic acid) | C <sub>16</sub> H <sub>18</sub> O <sub>9</sub>  | SM |
| 4-O-caffeoylquinic acid (PA3)                    | C <sub>16</sub> H <sub>18</sub> O <sub>9</sub>  | SM |
| 5-O-feruloylquinic acid (PA4)                    | C <sub>17</sub> H <sub>20</sub> O <sub>9</sub>  | SM |

|                                                          |                                                                |     |
|----------------------------------------------------------|----------------------------------------------------------------|-----|
| 1,5-O- dicaffeoylquinic acid (PA6)                       | C <sub>25</sub> H <sub>24</sub> O <sub>12</sub>                | SM  |
| 3,5-O- dicaffeoylquinic acid (PA5)                       | C <sub>25</sub> H <sub>24</sub> O <sub>12</sub>                | SM  |
| 4,5-O-dicaffeoylquinic acid (PA7)                        | C <sub>25</sub> H <sub>24</sub> O <sub>12</sub>                | SM  |
| cynarin                                                  | C <sub>25</sub> H <sub>24</sub> O <sub>12</sub>                | SM  |
| mariamide A                                              | C <sub>42</sub> H <sub>46</sub> N <sub>4</sub> O <sub>10</sub> | SM  |
| mariamide B                                              | C <sub>21</sub> H <sub>24</sub> N <sub>2</sub> O <sub>5</sub>  | SM  |
| 3- methylcarboxymethyl-indole-1-N-beta-D-glucopyranoside | C <sub>16</sub> H <sub>19</sub> NO <sub>7</sub>                | SM  |
| angeloylgomisin H                                        | C <sub>28</sub> H <sub>36</sub> O <sub>8</sub>                 | SCH |
| angeloylgomisin P                                        | C <sub>28</sub> H <sub>34</sub> O <sub>9</sub>                 | SCH |
| angeloylgomisin Q                                        | C <sub>29</sub> H <sub>38</sub> O <sub>9</sub>                 | SCH |
| benzoylgomisin H                                         | C <sub>30</sub> H <sub>34</sub> O <sub>8</sub>                 | SCH |
| benzoylgomisin O                                         | C <sub>30</sub> H <sub>32</sub> O <sub>8</sub>                 | SCH |
| gomisin A                                                | C <sub>23</sub> H <sub>28</sub> O <sub>7</sub>                 | SCH |
| gomisin B                                                | C <sub>28</sub> H <sub>34</sub> O <sub>9</sub>                 | SCH |
| gomisin D                                                | C <sub>28</sub> H <sub>34</sub> O <sub>10</sub>                | SCH |
| gomisin F                                                | C <sub>28</sub> H <sub>34</sub> O <sub>9</sub>                 | SCH |
| gomisin G                                                | C <sub>30</sub> H <sub>32</sub> O <sub>9</sub>                 | SCH |
| gomisin J                                                | C <sub>22</sub> H <sub>28</sub> O <sub>6</sub>                 | SCH |
| gomisin K1, K2, K3                                       | C <sub>23</sub> H <sub>30</sub> O <sub>6</sub>                 | SCH |
| gomisin M1, M2, L1, L2                                   | C <sub>22</sub> H <sub>26</sub> O <sub>6</sub>                 | SCH |
| gomisin N                                                | C <sub>23</sub> H <sub>28</sub> O <sub>6</sub>                 | SCH |
| isoschisandrin                                           | C <sub>24</sub> H <sub>32</sub> O <sub>7</sub>                 | SCH |
| propinquanin F                                           | C <sub>28</sub> H <sub>36</sub> O <sub>8</sub>                 | SCH |
| schisandrin                                              | C <sub>24</sub> H <sub>32</sub> O <sub>7</sub>                 | SCH |
| schisandrin A                                            | C <sub>24</sub> H <sub>32</sub> O <sub>6</sub>                 | SCH |
| schisandrin B                                            | C <sub>23</sub> H <sub>28</sub> O <sub>6</sub>                 | SCH |
| schisandrin C                                            | C <sub>22</sub> H <sub>24</sub> O <sub>6</sub>                 | SCH |
| schisantherin A                                          | C <sub>30</sub> H <sub>32</sub> O <sub>9</sub>                 | SCH |
| schisantherin C                                          | C <sub>28</sub> H <sub>34</sub> O <sub>9</sub>                 | SCH |
| tigloylgomisin P                                         | C <sub>28</sub> H <sub>34</sub> O <sub>9</sub>                 | SCH |

|                                                      |                                                               |    |
|------------------------------------------------------|---------------------------------------------------------------|----|
| adenosine                                            | C <sub>10</sub> H <sub>13</sub> N <sub>5</sub> O <sub>4</sub> | CS |
| cordycedipeptide A                                   | C <sub>9</sub> H <sub>14</sub> N <sub>3</sub> O <sub>3</sub>  | CS |
| cordycepic acid                                      | C <sub>6</sub> H <sub>14</sub> O <sub>6</sub>                 | CS |
| cordycepin                                           | C <sub>10</sub> H <sub>13</sub> N <sub>5</sub> O <sub>3</sub> | CS |
| cordypyridone A                                      | C <sub>16</sub> H <sub>23</sub> NO <sub>3</sub>               | CS |
| cordypyridone B                                      | C <sub>16</sub> H <sub>23</sub> NO <sub>3</sub>               | CS |
| dipicolinic acid                                     | C <sub>7</sub> H <sub>5</sub> NO <sub>4</sub>                 | CS |
| farinosone A                                         | C <sub>25</sub> H <sub>27</sub> NO <sub>4</sub>               | CS |
| farinosone B                                         | C <sub>25</sub> H <sub>26</sub> NO <sub>5</sub>               | CS |
| farinosone C                                         | C <sub>19</sub> H <sub>25</sub> NO <sub>5</sub>               | CS |
| hypoxanthine                                         | C <sub>5</sub> H <sub>4</sub> N <sub>4</sub> O                | CS |
| macrolides                                           | C <sub>10</sub> H <sub>14</sub> O <sub>4</sub>                | CS |
| militarinone A                                       | C <sub>26</sub> H <sub>37</sub> NO <sub>6</sub>               | CS |
| militarinone B                                       | C <sub>26</sub> H <sub>33</sub> NO <sub>5</sub>               | CS |
| militarinone C                                       | C <sub>26</sub> H <sub>33</sub> NO <sub>4</sub>               | CS |
| militarinone D                                       | C <sub>26</sub> H <sub>31</sub> NO <sub>4</sub>               | CS |
| myriocin                                             | C <sub>21</sub> H <sub>39</sub> NO <sub>6</sub>               | CS |
| N-acetylgalactosamine                                | C <sub>8</sub> H <sub>15</sub> NO <sub>6</sub>                | CS |
| naphthaquinone                                       | C <sub>10</sub> H <sub>6</sub> O <sub>2</sub>                 | CS |
| paecilomycine A                                      | C <sub>15</sub> H <sub>22</sub> O <sub>4</sub>                | CS |
| paecilomycine B                                      | C <sub>15</sub> H <sub>22</sub> O <sub>5</sub>                | CS |
| paecilomycine C                                      | C <sub>15</sub> H <sub>20</sub> O <sub>4</sub>                | CS |
| paecilosetin                                         | C <sub>22</sub> H <sub>31</sub> NO <sub>4</sub>               | CS |
| spirotenuipesine A                                   | C <sub>15</sub> H <sub>22</sub> O <sub>4</sub>                | CS |
| spirotenuipesine B                                   | C <sub>15</sub> H <sub>22</sub> O <sub>5</sub>                | CS |
| 2-(4-hydroxy phenyl) ethyl-O-beta-D- glucopyranoside | C <sub>14</sub> H <sub>20</sub> O <sub>7</sub>                | SB |
| apigenin 7-O-glucoside                               | C <sub>21</sub> H <sub>20</sub> O <sub>10</sub>               | SB |
| baicalein                                            | C <sub>15</sub> H <sub>10</sub> O <sub>5</sub>                | SB |
| baicalin                                             | C <sub>21</sub> H <sub>18</sub> O <sub>11</sub>               | SB |
| caffeic acid                                         | C <sub>9</sub> H <sub>8</sub> O <sub>4</sub>                  | SB |

|                                   |                                                 |    |
|-----------------------------------|-------------------------------------------------|----|
| isomartynoside                    | C <sub>31</sub> H <sub>40</sub> O <sub>15</sub> | SB |
| martynoside                       | C <sub>31</sub> H <sub>40</sub> O <sub>15</sub> | SB |
| neobaicalein (skullcapflavone II) | C <sub>19</sub> H <sub>18</sub> O <sub>8</sub>  | SB |
| oroxylin A                        | C <sub>16</sub> H <sub>12</sub> O <sub>5</sub>  | SB |
| oroxylin A glucoronide            | C <sub>22</sub> H <sub>20</sub> O <sub>11</sub> | SB |
| skullcapflavone I                 | C <sub>17</sub> H <sub>14</sub> O <sub>6</sub>  | SB |
| skullcapflavone I 2'-O-glucoside  | C <sub>23</sub> H <sub>24</sub> O <sub>11</sub> | SB |
| ursolic acid                      | C <sub>30</sub> H <sub>48</sub> O <sub>3</sub>  | SB |
| verbascoside                      | C <sub>29</sub> H <sub>36</sub> O <sub>15</sub> | SB |
| wogonin                           | C <sub>16</sub> H <sub>12</sub> O <sub>5</sub>  | SB |
| wonoside                          | C <sub>22</sub> H <sub>20</sub> O <sub>11</sub> | SB |
| <hr/>                             |                                                 |    |
| cinnamaldehyde                    | C <sub>9</sub> H <sub>8</sub> O                 | CB |
| fenchone                          | C <sub>10</sub> H <sub>16</sub> O               | CB |
| citral                            | C <sub>10</sub> H <sub>16</sub> O               | CB |
| salonitenolide                    | C <sub>15</sub> H <sub>20</sub> O <sub>4</sub>  | CB |
| cnicin                            | C <sub>20</sub> H <sub>26</sub> O <sub>7</sub>  | CB |
| arctigenin                        | C <sub>21</sub> H <sub>24</sub> O <sub>6</sub>  | CB |
| trachelogenin                     | C <sub>21</sub> H <sub>24</sub> O <sub>7</sub>  | CB |
| nortracheloside                   | C <sub>26</sub> H <sub>32</sub> O <sub>12</sub> | CB |
| absinthin                         | C <sub>30</sub> H <sub>40</sub> O <sub>6</sub>  | CB |
| alpha-amyrenone                   | C <sub>30</sub> H <sub>48</sub> O               | CB |
| alpha-amyrine                     | C <sub>30</sub> H <sub>50</sub> O               | CB |
| alpha-amyrin acetate              | C <sub>32</sub> H <sub>52</sub> O <sub>2</sub>  | CB |
| multiflorenol acetate             | C <sub>32</sub> H <sub>52</sub> O <sub>2</sub>  | CB |
| <hr/>                             |                                                 |    |
| p-anisaldehyde                    | C <sub>8</sub> H <sub>8</sub> O <sub>2</sub>    | FV |
| trans-anethole                    | C <sub>10</sub> H <sub>12</sub> O               | FV |
| estragole                         | C <sub>10</sub> H <sub>12</sub> O               | FV |
| fenchone                          | C <sub>10</sub> H <sub>16</sub> O               | FV |
| kaempferol                        | C <sub>15</sub> H <sub>10</sub> O <sub>6</sub>  | FV |
| naringenin                        | C <sub>15</sub> H <sub>12</sub> O <sub>5</sub>  | FV |

|                                              |                                                 |           |
|----------------------------------------------|-------------------------------------------------|-----------|
| acacetin                                     | C <sub>16</sub> H <sub>12</sub> O <sub>5</sub>  | <i>FV</i> |
| isorhamnetin                                 | C <sub>16</sub> H <sub>12</sub> O <sub>7</sub>  | <i>FV</i> |
| photoanethole                                | C <sub>16</sub> H <sub>16</sub> O <sub>2</sub>  | <i>FV</i> |
| 3-O-caffeoylquinic acid                      | C <sub>16</sub> H <sub>18</sub> O <sub>9</sub>  | <i>FV</i> |
| 4-O-caffeoylquinic acid                      | C <sub>16</sub> H <sub>18</sub> O <sub>9</sub>  | <i>FV</i> |
| 5-O-caffeoylquinic acid                      | C <sub>16</sub> H <sub>18</sub> O <sub>9</sub>  | <i>FV</i> |
| sinapyl glucoside                            | C <sub>17</sub> H <sub>22</sub> O <sub>9</sub>  | <i>FV</i> |
| rosmarinic acid                              | C <sub>18</sub> H <sub>16</sub> O <sub>8</sub>  | <i>FV</i> |
| dianethole                                   | C <sub>19</sub> H <sub>22</sub> O <sub>2</sub>  | <i>FV</i> |
| trans-resveratrol-3-O-beta-d-glucopyranoside | C <sub>20</sub> H <sub>22</sub> O <sub>8</sub>  | <i>FV</i> |
| kampferol-3-O-glucuronide                    | C <sub>21</sub> H <sub>18</sub> O <sub>12</sub> | <i>FV</i> |
| quercetin-3-O-glucuronide                    | C <sub>21</sub> H <sub>18</sub> O <sub>13</sub> | <i>FV</i> |
| kaempferol-3-O-glucoside                     | C <sub>21</sub> H <sub>20</sub> O <sub>11</sub> | <i>FV</i> |
| quercetin-3-O-galactoside (hyperoside)       | C <sub>21</sub> H <sub>20</sub> O <sub>12</sub> | <i>FV</i> |
| isoquercetin                                 | C <sub>21</sub> H <sub>20</sub> O <sub>12</sub> | <i>FV</i> |
| isorhamnetin-3-O-glucoside                   | C <sub>22</sub> H <sub>22</sub> O <sub>12</sub> | <i>FV</i> |
| syringin-4-O-beta-glucoside                  | C <sub>23</sub> H <sub>34</sub> O <sub>14</sub> | <i>FV</i> |
| 1,3-O-di-caffeoylquinic acid                 | C <sub>25</sub> H <sub>24</sub> O <sub>12</sub> | <i>FV</i> |
| 1,4-O-di-caffeoylquinic acid                 | C <sub>25</sub> H <sub>24</sub> O <sub>12</sub> | <i>FV</i> |
| 1,5-O-di-caffeoylquinic acid                 | C <sub>25</sub> H <sub>24</sub> O <sub>12</sub> | <i>FV</i> |
| kaempferol-3-O-rutinoside                    | C <sub>27</sub> H <sub>30</sub> O <sub>15</sub> | <i>FV</i> |
| eriodictyol-7-rutinoside                     | C <sub>27</sub> H <sub>32</sub> O <sub>15</sub> | <i>FV</i> |
| cis a trans-miyabenol C                      | C <sub>42</sub> H <sub>32</sub> O <sub>9</sub>  | <i>FV</i> |
| gallic acid                                  | C <sub>7</sub> H <sub>6</sub> O <sub>5</sub>    | <i>TO</i> |
| esculetin                                    | C <sub>9</sub> H <sub>6</sub> O <sub>4</sub>    | <i>TO</i> |
| caffeic acid                                 | C <sub>9</sub> H <sub>8</sub> O <sub>4</sub>    | <i>TO</i> |
| apigenin                                     | C <sub>15</sub> H <sub>10</sub> O <sub>5</sub>  | <i>TO</i> |
| luteolin                                     | C <sub>15</sub> H <sub>10</sub> O <sub>6</sub>  | <i>TO</i> |
| quercetin                                    | C <sub>15</sub> H <sub>10</sub> O <sub>7</sub>  | <i>TO</i> |
| taraxinic acid                               | C <sub>15</sub> H <sub>18</sub> O <sub>4</sub>  | <i>TO</i> |

|                                                  |                                                 |    |
|--------------------------------------------------|-------------------------------------------------|----|
| coumestrol                                       | C <sub>15</sub> H <sub>8</sub> O <sub>5</sub>   | TO |
| chlorogenic acid                                 | C <sub>16</sub> H <sub>18</sub> O <sub>9</sub>  | TO |
| artemetin                                        | C <sub>20</sub> H <sub>20</sub> O <sub>8</sub>  | TO |
| luteolin-7-O-beta-D-glucopyranoside (cyranoside) | C <sub>21</sub> H <sub>20</sub> O <sub>11</sub> | TO |
| isoquercetin                                     | C <sub>21</sub> H <sub>20</sub> O <sub>12</sub> | TO |
| beta-amyrin                                      | C <sub>30</sub> H <sub>50</sub> O               | TO |
| taraxerol                                        | C <sub>30</sub> H <sub>50</sub> O               | TO |
| taraxasterol                                     | C <sub>30</sub> H <sub>50</sub> O               | TO |
| taraxasteryl acetate                             | C <sub>32</sub> H <sub>52</sub> O <sub>2</sub>  | TO |
| lutein epoxide                                   | C <sub>40</sub> H <sub>56</sub> O <sub>3</sub>  | TO |
| lutein                                           | C <sub>40</sub> H <sub>56</sub> O <sub>2</sub>  | TO |
| 4-methyl coumarin                                | C <sub>10</sub> H <sub>8</sub> O <sub>2</sub>   | GG |
| liqcoumarin                                      | C <sub>12</sub> H <sub>10</sub> O <sub>4</sub>  | GG |
| quercetin                                        | C <sub>15</sub> H <sub>10</sub> O <sub>7</sub>  | GG |
| liquiritigenin                                   | C <sub>15</sub> H <sub>12</sub> O <sub>4</sub>  | GG |
| isoliquiritigenin                                | C <sub>15</sub> H <sub>12</sub> O <sub>4</sub>  | GG |
| glyzaglabrin                                     | C <sub>16</sub> H <sub>10</sub> O <sub>6</sub>  | GG |
| formononetin                                     | C <sub>16</sub> H <sub>12</sub> O <sub>4</sub>  | GG |
| 7-methoxy-2-methylisoflavone                     | C <sub>17</sub> H <sub>14</sub> O <sub>3</sub>  | GG |
| 7-acetoxy-2-methyl-isoflavone                    | C <sub>18</sub> H <sub>14</sub> O <sub>4</sub>  | GG |
| glyzarin                                         | C <sub>18</sub> H <sub>14</sub> O <sub>4</sub>  | GG |
| licoisoflavone B                                 | C <sub>20</sub> H <sub>16</sub> O <sub>6</sub>  | GG |
| glabrene                                         | C <sub>20</sub> H <sub>18</sub> O <sub>4</sub>  | GG |
| licoflavonol                                     | C <sub>20</sub> H <sub>18</sub> O <sub>6</sub>  | GG |
| licoisoflavone A                                 | C <sub>20</sub> H <sub>18</sub> O <sub>6</sub>  | GG |
| glabridin                                        | C <sub>20</sub> H <sub>20</sub> O <sub>4</sub>  | GG |
| quercetin-3-glucoside                            | C <sub>21</sub> H <sub>20</sub> O <sub>12</sub> | GG |
| isoliquiritin                                    | C <sub>21</sub> H <sub>22</sub> O <sub>9</sub>  | GG |
| liquiritoside (liquiritin)                       | C <sub>21</sub> H <sub>22</sub> O <sub>9</sub>  | GG |
| glabrol                                          | C <sub>25</sub> H <sub>28</sub> O <sub>4</sub>  | GG |



|                               |                                                 |    |
|-------------------------------|-------------------------------------------------|----|
| licuraside                    | C <sub>26</sub> H <sub>30</sub> O <sub>13</sub> | GG |
| isoglabrolide                 | C <sub>30</sub> H <sub>44</sub> O <sub>4</sub>  | GG |
| glabrolide                    | C <sub>30</sub> H <sub>44</sub> O <sub>4</sub>  | GG |
| liquoric acid                 | C <sub>30</sub> H <sub>44</sub> O <sub>5</sub>  | GG |
| liquiritic acid               | C <sub>30</sub> H <sub>46</sub> O <sub>4</sub>  | GG |
| glycyrrhetic acid (enoxolone) | C <sub>30</sub> H <sub>46</sub> O <sub>4</sub>  | GG |
| glycyrrhizin                  | C <sub>42</sub> H <sub>62</sub> O <sub>16</sub> | GG |
| licoagrone                    | C <sub>45</sub> H <sub>42</sub> O <sub>10</sub> | GG |

<sup>1</sup> Abenavoli, L.M.; Capasso, R.; Milic, N.; Capasso, F. Milk thistle in liver diseases: Past, present, future. *Phytother. Res.* 2010, 24, 1423–1432.

<sup>2</sup> Chambers, C.S.; Holečková, V.; Petrásková, L.; Biedermann, D.; Valentová, K.; Buchta, M.; Křen, V. The silymarin composition... and why does it matter??? *Food Res. Int.* 2017, 100, 339–353, doi:10.1016/j.foodres.2017.07.017.

<sup>3</sup> Andrzejewska, J.; Martinelli, T.; Sadowska, K. *Silybum marianum*: Non-medical exploitation of the species. *Ann. Appl. Boil.* 2015, 167, 285–297.

<sup>4</sup> Milić, N.; Milosević, N.; Suvajdzić, L.; Zarkov, M.; Abenavoli, L. New therapeutic potentials of milk thistle (*Silybum marianum*). *Nat. Prod. Commun.* 2013, 8, 1801–1810.

<sup>5</sup> Csupor, D.; Csorba, A.; Hohmann, J. Recent advances in the analysis of flavonolignans of *Silybum marianum*. *J. Pharm. Biomed. Anal.* 2016, 130, 301–317.

<sup>6</sup> de Oliveira, D.R.; Schaffer, L.F.; Busanello, A.; Barbosa, C.P.; Peroza, L.R.; de Freitas, C.M.; Krum, B.N.; Bressan, G.N.; Boligon, A.A.; Athayde, M.L.; et al. Silymarin has antioxidant potential and changes the activity of Na<sup>+</sup>/K<sup>+</sup>-ATPase and monoamine oxidase in vitro. *Ind. Crop. Prod.* 2015, 70, 347–355, doi:10.1016/j.indcrop.2015.03.060.

<sup>7</sup> Lucini, L.; Kane, D.; Pellizzoni, M.; Ferrari, A.; Trevisi, E.; Ruzickova, G.; Arslan, D.; Luigi, L. Phenolic profile and in vitro antioxidant power of different milk thistle [*Silybum marianum* (L.) Gaertn.] cultivars. *Ind. Crop. Prod.* 2016, 83, 11–16.

<sup>8</sup> Qin, N.-B.; Jia, C.-C.; Xu, J.; Li, D.-H.; Xu, F.-X.; Bai, J.; Li, Z.-L.; Hua, H.-M. New amides from seeds of *Silybum marianum* with potential antioxidant and antidiabetic activities. *Fitoterapia* 2017, 119, 83–89.

<sup>9</sup> Mhamdi, B.; Abbassi, F.; Smaoui, A.; Abdely, C.; Marzouk, B. Fatty acids, essential oil and phenolics composition of *Silybum marianum* seeds and their antioxidant activities. *Pak. J. Pharm. Sci.* 2016, 29, 953–959.

<sup>10</sup> Uehara, A.; Nakata, M.; Kitajima, J.; Iwashina, T. Internal and external flavonoids from the leaves of Japanese *Chrysanthemum* species (Asteraceae). *Biochem. Syst. Ecol.* 2012, 41, 142–149.

<sup>11</sup> Lee, D.-K.; Yoon, M.H.; Kang, Y.P.; Yu, J.; Park, J.H.; Lee, J.; Kwon, S.W. Comparison of primary and secondary metabolites for suitability to discriminate the origins of *Schisandra chinensis* by GC/MS and LC/MS. *Food Chem.* 2013, 141, 3931–3937.

<sup>12</sup> Tuli, H.S.; Sandhu, S.S.; Sharma, A.K. Pharmacological and therapeutic potential of cordyceps with special reference to cordycepin. *3 Biotech* 2014, 4, 1–12, doi:10.1007/s13205-013-0121-9.

<sup>13</sup> Xiao, J.-H.; Zhong, J.-J. Secondary Metabolites from Cordyceps Species and Their Antitumor Activity Studies. *Recent Patents Biotechnol.* 2007, 1, 123–137.

<sup>14</sup> Mousavi, S.N.M.; Delazar, A.; Nazemiyeh, H.; Khodaie, L. Biological Activity and Phytochemical Study of *Scutellaria platystegia*. *Iran. J. Pharm. Res.* 2015, 14, 215–223.

<sup>15</sup> Gong, P.; Li, Y.; Yao, C.; Guo, H.; Hwang, H.; Liu, X.; Xu, Y.; Wang, X. Traditional Chinese Medicine on the Treatment of Coronary Heart Disease in Recent 20 Years. *J. Altern. Complement. Med.* 2017, 23, 659–666.

- <sup>16</sup> Chabane, D.; Assani, A.; Mouhoub, F.; Chahinez, B.; Nacer-bey, N. Anatomical, phytochemical and pharmacological studies of roots of *Cnicus benedictus* L. *Int. J. Med. Plant Res.* 2013, 2, 204–208.
- <sup>17</sup> Singh, G.; Maurya, S.; De Lampasona, M.P.; Catalán, C. Chemical constituents, antifungal and antioxidative potential of *Foeniculum vulgare* volatile oil and its acetone extract. *Food Control.* 2006, 17, 745–752.
- <sup>18</sup> Rather, M.A.; Dar, B.A.; Sofi, S.N.; Bhat, B.A.; Qurishi, M.A. *Foeniculum vulgare*: A comprehensive review of its traditional use, phytochemistry, pharmacology, and safety. *Arab. J. Chem.* 2016, 9, S1574–S1583.
- <sup>19</sup> Huber, M.; Triebwasser-Freese, D.; Reichelt, M.; Heiling, S.; Paetz, C.; Chandran, J.N.; Bartram, S.; Schneider, B.; Gershenzon, J.; Erb, M. Identification, quantification, spatiotemporal distribution and genetic variation of major latex secondary metabolites in the common dandelion (*Taraxacum officinale* agg.). *Phytochem* 2015, 115, 89–98.
- <sup>20</sup> Fenwick, G.; Lutomski, J.; Nieman, C. Liquorice, *Glycyrrhiza glabra* L. —Composition, uses and analysis. *Food Chem.* 1990, 38, 119–143.

**Supplementary Table 2** Characteristics of the bioactive compounds identified by the U-HPLC-HRMS/MS targeted screening.



[illegible]

[illegible]



[illegible]



[illegible]

[illegible]

[illegible]

[illegible]

[illegible]



|                                                                                |                |                                                                                                                            |                    |        |        |                    |
|--------------------------------------------------------------------------------|----------------|----------------------------------------------------------------------------------------------------------------------------|--------------------|--------|--------|--------------------|
|                                                                                |                | isokaempferide-7-rhamnoside; isoorientin;<br>isovitexin; kaempferol-3-rutinoside; miquelianin;<br>orientin; rutin; vitexin |                    |        |        |                    |
|                                                                                | flavonolignans | isosilandrin A,B; neosilyhermin A,B; silandrin<br>A,B; silyamandin; silyhermin; silymonin                                  | 0.277              | 0.420  | -0.246 | 0.446              |
|                                                                                | isoflavone     | genistein                                                                                                                  | -0.380             | 0.045  | 0.740  | 0.165              |
| SUM of<br>flavone/flavonol<br>aglycones and<br>glycosides                      |                |                                                                                                                            | 0.201              | -0.139 | -0.409 | 0.465              |
| SUM of<br>flavone/flavonol<br>aglycones and<br>glycosides and<br>isoflavonoids |                |                                                                                                                            | 0.204              | -0.139 | -0.411 | 0.466              |
| SUM of flavonoids                                                              |                |                                                                                                                            | 0.363              | 0.045  | -0.518 | 0.599 <sup>a</sup> |
| SUM of phenolics                                                               |                |                                                                                                                            | 0.647 <sup>a</sup> | 0.332  | -0.171 | 0.607 <sup>a</sup> |
| Alkaloids                                                                      |                | 3- methylcarboxymethyl-indole-1-N-beta-D-<br>glucopyranoside                                                               | 0.520 <sup>a</sup> | 0.232  | -0.445 | 0.232              |

<sup>a</sup> Correlation coefficient confirms ( $\alpha=0.05$ ) that the results of antioxidant assay linearly depend on U-HPLC-HRMS/MS responses of non-silymarin antioxidants present in *Silybum marianum* (ABTS df=14, critical value=0.497; ORAC df=19, critical value=0.433; DPPH df=20, critical value=0.423; CAA df=15, critical value=0.482).

<sup>b</sup> For the non-silymarin antioxidants, the analytical standards were not available, so we correlated the sum of areas of the peaks of U-HPLC-HRMS/MS chromatograms.

**Supplementary Table 4** Correlation coefficients (R<sup>2</sup>) of dependence of antioxidant activity of 26 dietary supplements on U-HPLC-HRMS/MS responses<sup>b</sup> of non-silymarin bioactive compounds present in other plants - *Schisandra chinensis*, *Cordyceps sinensis*, *Scutellaria baicalensis*, *Cnicus benedictus*, *Foeniculum vulgare*, *Taraxacum officinale* and *Glycyrrhiza glabra*.

|           |                                      |                    | Potential identity (compound from database)                                                                                              | R <sup>2</sup> |        |                    |                    | critical value |       |       |       |
|-----------|--------------------------------------|--------------------|------------------------------------------------------------------------------------------------------------------------------------------|----------------|--------|--------------------|--------------------|----------------|-------|-------|-------|
|           |                                      |                    |                                                                                                                                          | CAA            | ABTS   | ORAC               | DPPH               | CAA            | ABTS  | ORAC  | DPPH  |
| Phenolics | Simple phenolics                     |                    | cordycepic acid; isomartynoside; martynoside; naphthaquinone; rosmarinic acid; syringin-4-O-beta-glucoside; verbascoside                 | 0.194          | -0.745 | -0.546             | -0.593             | 0.95           | 0.95  | 0.95  | 0.95  |
|           | Coumarins                            |                    | methylcoumarin<br>angeloylgomisin H; angeloylgomisin P; angeloylgomisin Q; arctigenin; benzoylgomisin H; gomisin                         | -0.604         | -0.218 | -0.100             | -0.451             | 0.497          | 0.433 | 0.423 | 0.482 |
|           | Lignans                              | lignans            | A,B,DF,G,J,K1,K2,K3,L1,L2,M1,M2,N; isoschisandrin; propinquanin F; schisandrin A,B,C; schisantherin A,C; tigloylgomisin P; trachelogenin | -0.375         | -0.302 | 0.019              | 0.030              | 0.497          | 0.433 | 0.423 | 0.482 |
|           |                                      | lignan glycosides  | nortracheloside                                                                                                                          | 0.963          | -0.995 | 0.998 <sup>a</sup> | 0.919              | 0.997          | 0.997 | 0.997 | 0.997 |
|           | SUM of lignans and lignan glycosides |                    |                                                                                                                                          | -0.390         | -0.305 | 0.017              | 0.029              | 0.497          | 0.433 | 0.423 | 0.482 |
|           | Flavonoids                           | flavones/flavonols | baicalein; glabrol; isorhamnetin; neobaicalein; oroxylin A; skullcapflavone I; wogonin                                                   | 0.048          | -0.029 | -0.351             | 0.240              | 0.497          | 0.433 | 0.433 | 0.497 |
|           |                                      | isoflavonoids      | 7-acetoxy-2-methyl-isoflavone; formononetin; glabrene; glabridin; glyzarin; licoflavonol; licoisoflavone A, B                            | 0.000          | -0.569 | -0.773             | -0.318             | 0.95           | 0.95  | 0.95  | 0.95  |
|           |                                      | chalcones          | isoliquiritigenin; licuraside                                                                                                            | 0.707          | -0.697 | 0.409              | -0.997             | 0.95           | 0.95  | 0.95  | 0.95  |
|           | SUM of flavonoids                    |                    |                                                                                                                                          | 0.117          | -0.056 | -0.341             | 0.199              | 0.497          | 0.433 | 0.433 | 0.497 |
|           | SUM of phenolics                     |                    |                                                                                                                                          | 0.029          | -0.315 | -0.023             | 0.058              | 0.497          | 0.433 | 0.423 | 0.482 |
| Saponins  | triterpenoidal                       |                    | glabrolide; glycyrrhizin; isoglabrolide                                                                                                  | -0.194         | 0.735  | 0.554              | 0.585              | 0.95           | 0.95  | 0.95  | 0.95  |
| Terpenes  | mono                                 |                    | citral; fenchone                                                                                                                         | -0.983         | 0.983  | -0.989             | -0.949             | 0.997          | 0.997 | 0.997 | 0.997 |
|           | sesqui                               |                    | cnicin; salonitenolide                                                                                                                   | -0.454         | 0.102  | -0.138             | -0.568             | 0.997          | 0.997 | 0.997 | 0.997 |
|           | tri                                  |                    | alpha,beta-amyrine; glycyrrhetinic acid; liquiritic acid; taraxasterol; taraxerol; ursolic acid                                          | -0.572         | 0.822  | -0.097             | 0.964 <sup>a</sup> | 0.95           | 0.95  | 0.95  | 0.950 |



|                    |        |        |        |        |       |       |       |       |
|--------------------|--------|--------|--------|--------|-------|-------|-------|-------|
| SUM of<br>terpenes | -0.596 | -0.893 | -0.606 | -0.726 | 0.754 | 0.754 | 0.754 | 0.754 |
|--------------------|--------|--------|--------|--------|-------|-------|-------|-------|

---

<sup>a</sup> Correlation coefficient confirms ( $\alpha=0.05$ ) that the results of antioxidant assay linearly depend on U-HPLC-HRMS/MS responses of non-silymarin antioxidants present in other plants - *Schisandra chinensis*, *Cordyceps sinensis*, *Scutellaria baicalensis*, *Cnicus benedictus*, *Foeniculum vulgare*, *Taraxacum officinale* and *Glycyrrhiza glabra*.

<sup>b</sup> For the non-silymarin antioxidants, the analytical standards were not available, so we correlated the sum of areas of the peaks of U-HPLC-HRMS/MS chromatograms
